# Supplementary material for: Haemoglobin-loaded metal organic framework-based nanoparticles camouflaged with a red blood cell membrane as potential oxygen delivery systems
Source: Royal Society of Chemistry journal article supplement (doi:10.1039/d0bm01118e), 2020-01-01
Supplement: d0bm01118e1.pdf [file d0bm01118e1.pdf]

## Supporting Information

### **Haemoglobin-Loaded Metal Organic Framework-Based Nanoparticles Camouflaged With a Red Blood Cell Membrane as Potential Oxygen Delivery Systems**

*Xiaoli Liu,<sup>†</sup> Michelle M. T. Jansman,<sup>†</sup> and Leticia Hosta-Rigau<sup>†,\*</sup>*

<sup>†</sup> DTU Health Tech, Center for Nanomedicine and Theranostics, Technical University of Denmark, Nils Koppels Allé, B423, 2800 Kgs. Lyngby, Denmark

E-mail: [leri@dtu.dk](mailto:leri@dtu.dk)

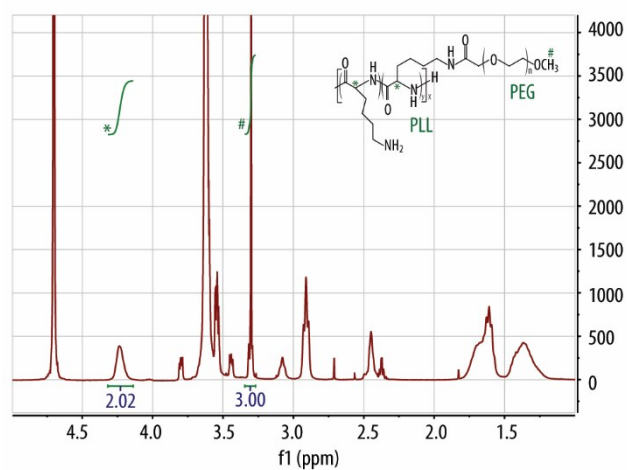

**Figure S1.**  $^1\text{H}$  NMR spectrum of PLL-g-PEG in  $\text{D}_2\text{O}$ . The percentage PEG observed is obtained from the ratio of the signal of “\*H” of “-N-CHR-COO-” to the signal of “#H” of “-CH $_3$ ”.

| Sample                 | pH value |
|------------------------|----------|
| MQ                     | 6.18     |
| MOF-NPs                | 5.60     |
| MOF <sup>Hb</sup> -NPs | 6.68     |

**Table S1.** The pH values of different nanoparticle suspensions.

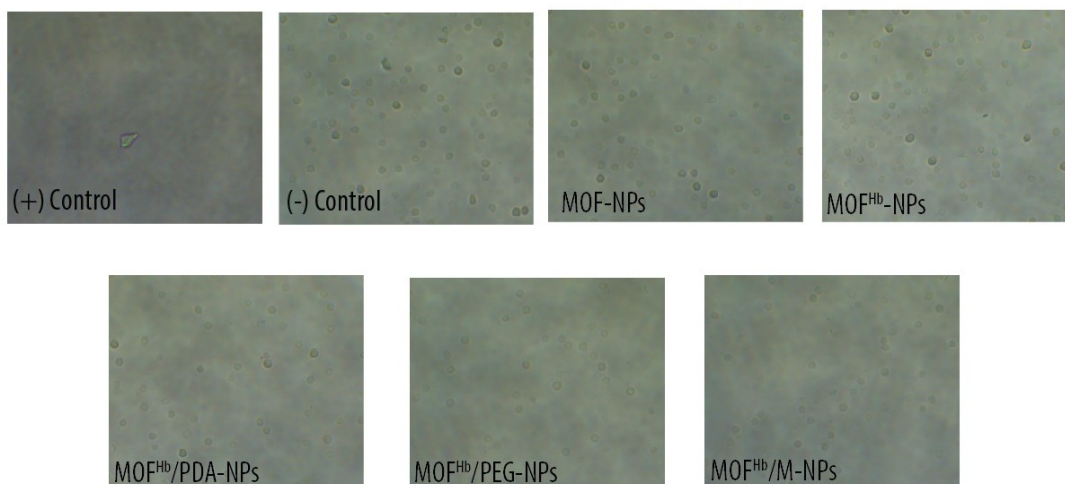

**Figure S2.** Microscope images of the blood cells after treatment with different samples: positive control, negative control and the different nanocarriers, MOF-NPs, MOF<sup>Hb</sup>-NPs, MOF<sup>Hb</sup>/PDA-NPs, MOF<sup>Hb</sup>/PEG-NPs and MOF<sup>Hb</sup>/M-NPs.
